# Supplementary material
Source: publisher figshare collection journal article supplement (https://tandf.figshare.com/ndownloader/files/22351305)
Supplement: Supplementary file 1 [file 22351305]

Supplementary Material

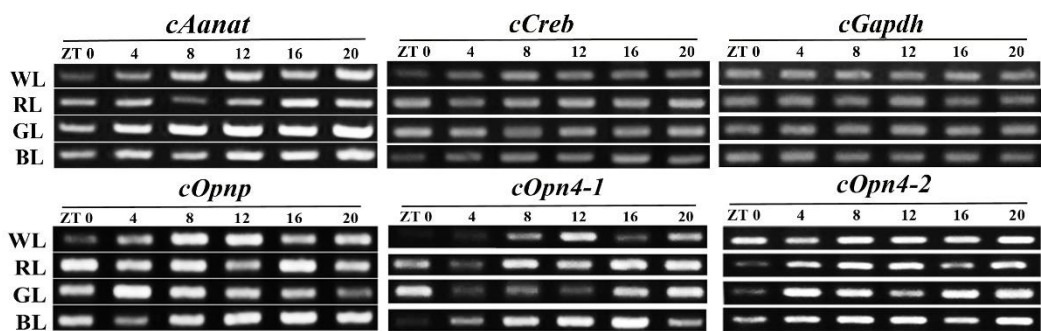

**Supplementary Figure 1.** Effect of monochromatic light on the circadian expression of *cAanat*, *cCreb* and the opsins (*cOpnp*, *cOpn4-1* and *cOpn4-2*) in RT-PCR gel in the pineal glands of chicks. WL, white light; RL, red light; GL, green light; BL, blue light. ZT, zeitgeber time.
